# Supplementary material
Source: publisher site journal article supplement (https://www.dovepress.com/article/365988)
Supplement: Supplementary file 1 [file get_supplementary_file.php]

**Supplementary Table 1**. The loci in a previous major insomnia GWAS intersected in TWB2 arrays

| **No.** | **Loci** | **Gene** | **Type** | **EAF** | **Source** |
| --- | --- | --- | --- | --- | --- |
| 1 | rs1015438 | SALL1 | intronic | 0.047 | Jasen, P.R., et al. Nat Genet (2019) |
| 2 | rs1064213 | PLCL1 | missense | 0.2471 |
| 3 | rs10758593 | GLIS3 | intronic | 0.3866 |
| 4 | rs10761240 | PHF2 | intronic | 0.264 |
| 5 | rs10947428 | ITPR3 | intronic | 0.035 |
| 6 | rs113851554 | MEIS1 | intronic | 0 |
| 7 | rs12614369 | MEIS1 | intronic | 0.235 |
| 8 | rs152555 | EFNA5 | intronic | 0.806 |
| 9 | rs1927902 | None | intergenic | 0.99 |
| 10 | rs238869 | OR5V1 | intronic | 0.68 |
| 11 | rs2398144 | GNAO1 | intronic | 0.78 |
| 12 | rs2737240 | TRPS1 | intronic | 0.338 |
| 13 | rs2815757 | LOC105378797 | intronic | 0.98 |
| 14 | rs3131638 | MICB | intronic | 0.897 |
| 15 | rs34490907 | SPAG5-AS1 | intronic | 0.03 |
| 16 | rs4643373 | IGF2BP1 | intronic | 0.006 |
| 17 | rs4702 | rs4702 | intronic | 0.502 |
| 18 | rs6119267 | NOL4L | intronic | 0 |
| 19 | rs647905 | None | intergenic | 0.579 |
| 20 | rs6510033 | None | intergenic | 0.3294 |
| 21 | rs728017 | NKAIN2 | intronic | 0.927 |
| 22 | rs77641763 | EXD3 | intronic | 0.024 |
| 23 | rs8181889 | OLFM4 | intronic | 0.58 |
| 24 | rs910187 | ZMYND8 | intronic | 0.2275 |
| 25 | rs984306 | LINC01798 | intronic | 0.584 |

EAF, Effect Allele Frequency of East Asian group in dbSNP.

**Supplementary Table 2.** Association between the gender factors in all migraine patients grouped by the presence or absence of insomnia

| **Groups** | **SNP** | **Position**  **(GRCh38.p12)** | **MAF** | **TWB** | **Gene** | **Type** | **Variant change** | **Variant allele frequency** | | **OR** | ***P*-value** |
| --- | --- | --- | --- | --- | --- | --- | --- | --- | --- | --- | --- |
| **Insomnia**  **group** | **Non-insomnia**  **group** |
| Male | rs145888117 | chr9:96557057 | 0.033 | 0.033 | CDC14B | intronic | G>A | 0.32% | 9.46% | 0.03  [0.0,0.25] | 7.00E-07 |
| Female | rs28535526 | chr22:48692695 | 0.128 | 0.130 | TAFA5 | intronic | G>A | 11.44% | 25.60% | 0.38 [0.25,0.56] | 5.12E-07 |

A phenotype association study was performed on all migraine cohorts, which were divided into male and female and grouped by the presence or absence of insomnia. Significant variants with P-value < 1E-6 are listed with the allele frequency, odds ratio (OR), and 95% confidence interval. MAF, minor allele frequency of East Asian group in dbSNP; TWB, minor allele frequency in Taiwan Biobank.
